# Supplementary material
Source: PubMed Central journal article supplement (PMC7655287)
Supplement: 16-01046.pdf [file 16-01046.pdf]

**On-line Table 1: Demographic data of control group**

| Sex        | Mean Age (yr)       | Most Common Diagnosis |
|------------|---------------------|-----------------------|
| 66% Female | 44.6 (range, 15–71) | Facial spasm (20%)    |

**On-line Table 2: Clinical outcomes following microvascular decompression**

| Sex        | Mean Age at Operation (Range) (yr) | Side                   | Complete Pain Relief (Scale 1) <sup>a</sup> | Mean Follow-Up (Range), (Days) |
|------------|------------------------------------|------------------------|---------------------------------------------|--------------------------------|
| 64% Female | 49.2 (27–71)                       | 35 L (43%), 46 R (57%) | 52 (64%) Complete relief                    | 275 (3–1228)                   |

Note:—L indicates left; R, right.

<sup>a</sup>Scales for pain relief are types 1, 2, 3, 4, and no relief.

**On-line Table 3: Correlation between grade of neurovascular conflict as determined on CE-CISS and NE-CISS with type of postoperative outcome after MVD**

| Pain Relief Type | Contrast Enhancement | Grade of Neurovascular Conflict (No.) (%) |      |    |       |    |       |    |       | P Value (Fisher Exact Test) <sup>a</sup> |
|------------------|----------------------|-------------------------------------------|------|----|-------|----|-------|----|-------|------------------------------------------|
|                  |                      | 0                                         | 1    | 2  | 3     | 0  | 1     | 2  | 3     |                                          |
| 1                | Contrast–            | 2                                         | 2.5% | 19 | 23.5% | 22 | 27.2% | 9  | 11.1% | .03                                      |
|                  | Contrast+            | 2                                         | 2.5% | 15 | 18.5% | 13 | 16.0% | 22 | 27.2% |                                          |
| 2                | Contrast–            | 2                                         | 2.5% | 7  | 8.6%  | 1  | 1.2%  | 1  | 1.2%  | 1                                        |
|                  | Contrast+            | 2                                         | 2.5% | 7  | 8.6%  | 0  | 0.0%  | 2  | 2.5%  |                                          |
| 3                | Contrast–            | 4                                         | 4.9% | 4  | 4.9%  | 3  | 3.7%  | 1  | 1.2%  | 1                                        |
|                  | Contrast+            | 4                                         | 4.9% | 4  | 4.9%  | 2  | 2.5%  | 2  | 2.5%  |                                          |
| 4                | Contrast–            | 2                                         | 2.5% | 2  | 2.5%  | 0  | 0.0%  | 1  | 1.2%  | 1                                        |
|                  | Contrast+            | 2                                         | 2.5% | 2  | 2.5%  | 0  | 0.0%  | 1  | 1.2%  |                                          |

<sup>a</sup>The P value was obtained by comparing rows with and without contrast.

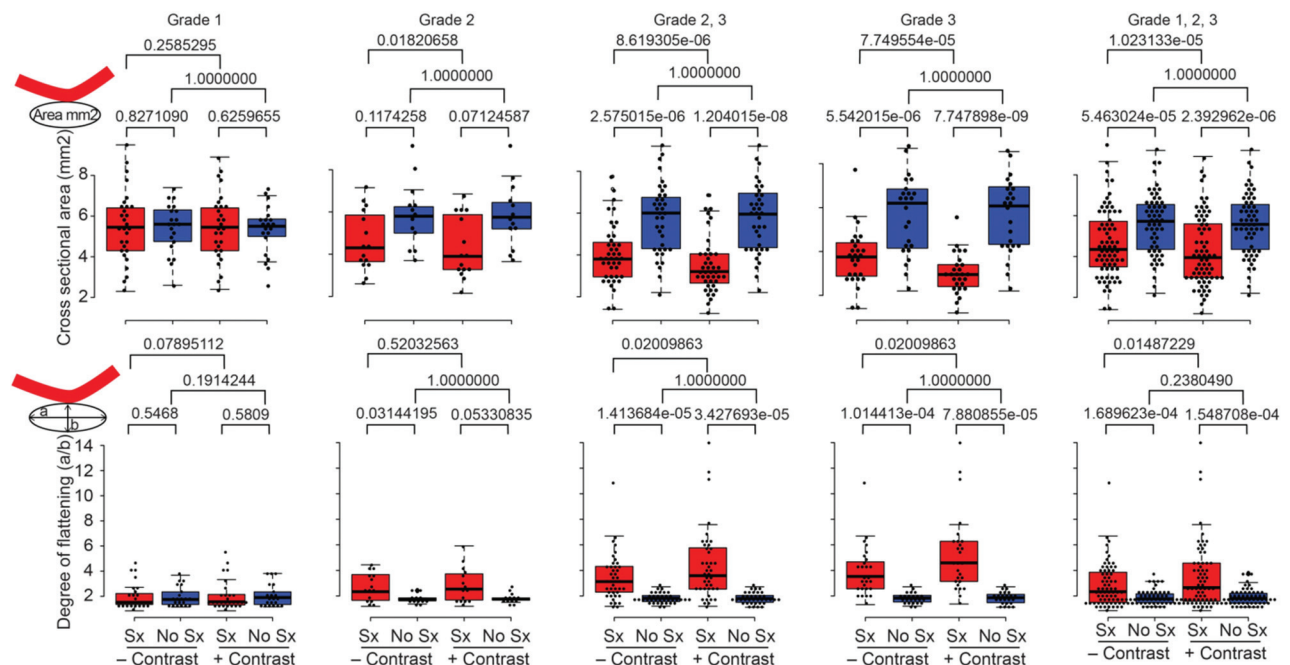

**ON-LINE FIG 1.** Cross-sectional area and degree of flattening for various combinations of grades of neurovascular conflict on the symptomatic and asymptomatic sides assessed either with or without contrast. Sx indicates symptom; No Sx, no symptoms.

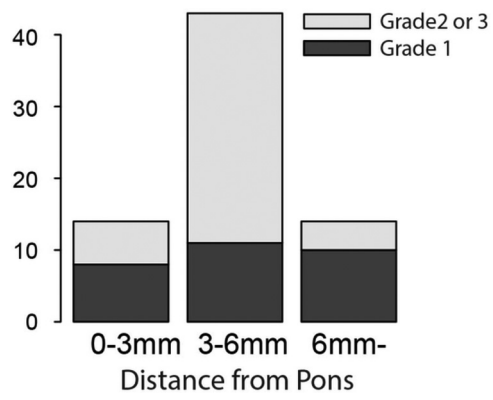

**ON-LINE FIG 2.** Distance from the pons for occurrences of simple contact (grade 1) and advanced-grade neurovascular conflict (grade 2 or 3).
